# Supplementary material for: microRNAs Control Antiviral Immune Response, Cell Death and Chemotaxis Pathways in Human Neuronal Precursor Cells (NPCs) during Zika Virus Infection
Source: MDPI journal article supplement (doi:10.3390/ijms231810282), 2022-09-07
Supplement: s1 [file s1]

Supplementary Materials:

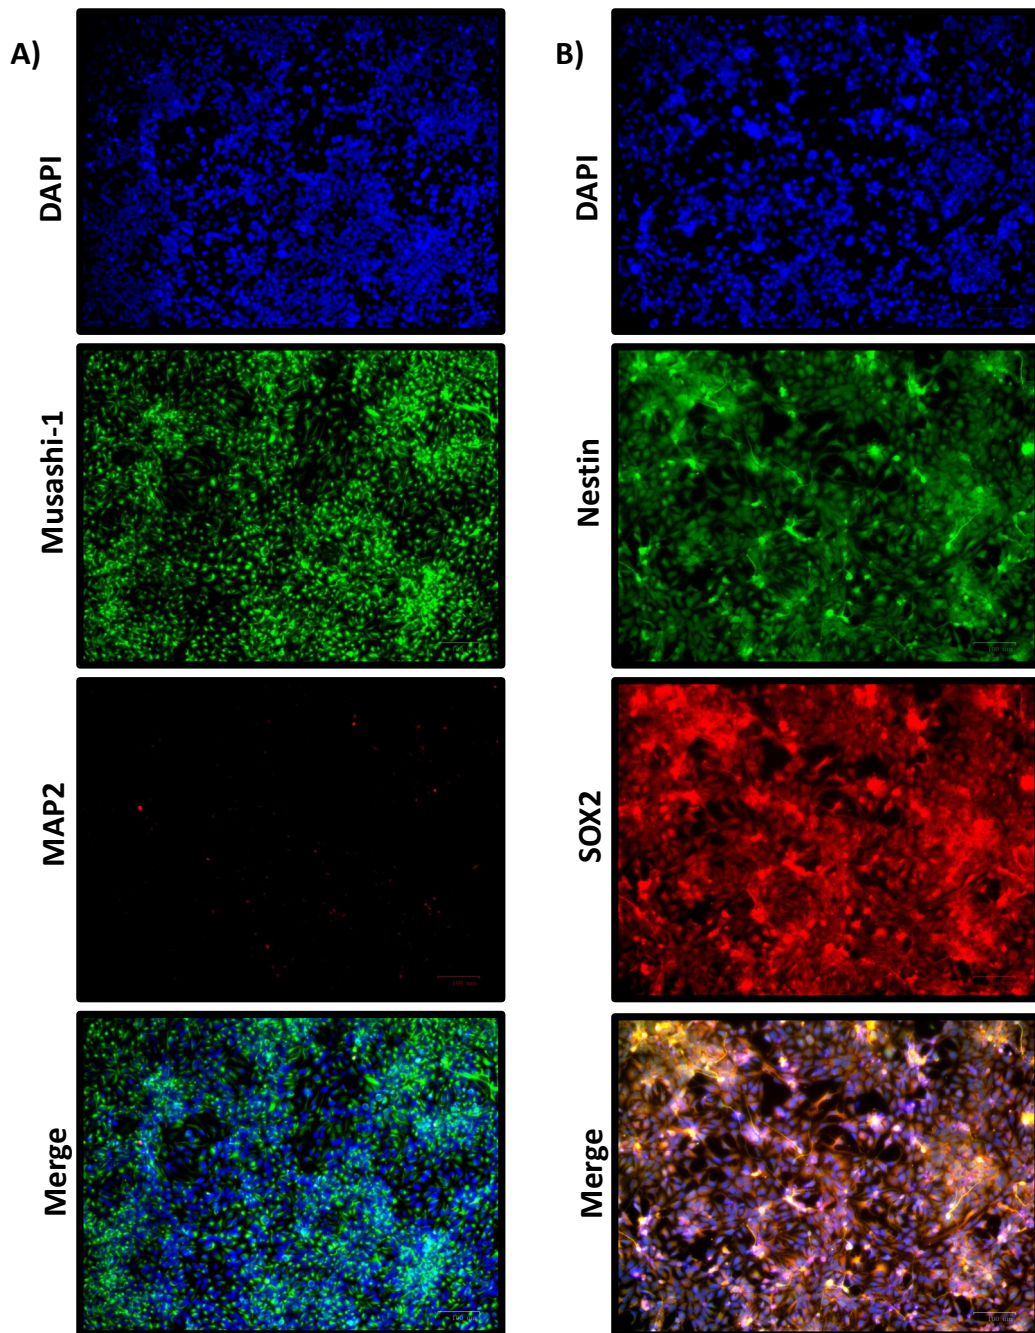

**Figure S1. Characterization of human NPCs.** Immunofluorescence analysis of NPCs-specific markers. **A)** DAPI (blue), Musashi-1 (green), MAP2 (red) and merge images. **B)** DAPI (blue), Nestin (green), SOX2 (red) and merge images. 20X magnification.
